# Supplementary figures and images for: Plasma glutamine concentration after intensive care unit discharge: an observational study
Source: Springer Nature journal article supplement (doi:10.1186/s13054-014-0677-8), 2014-12-01

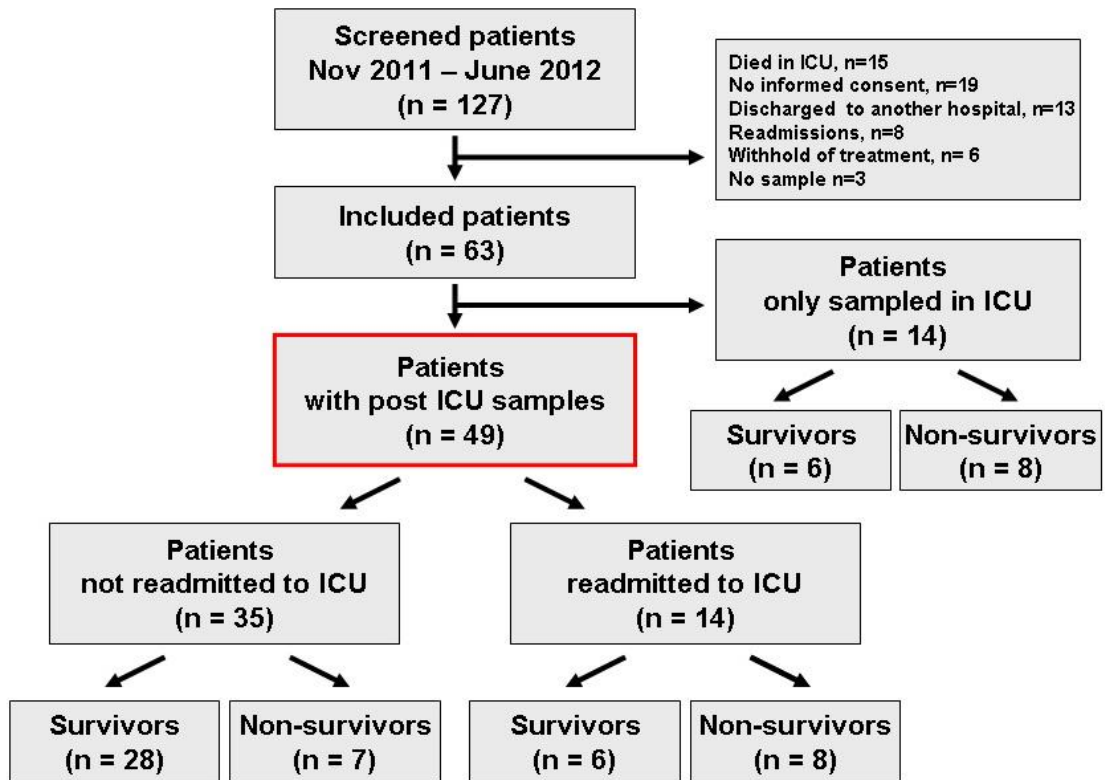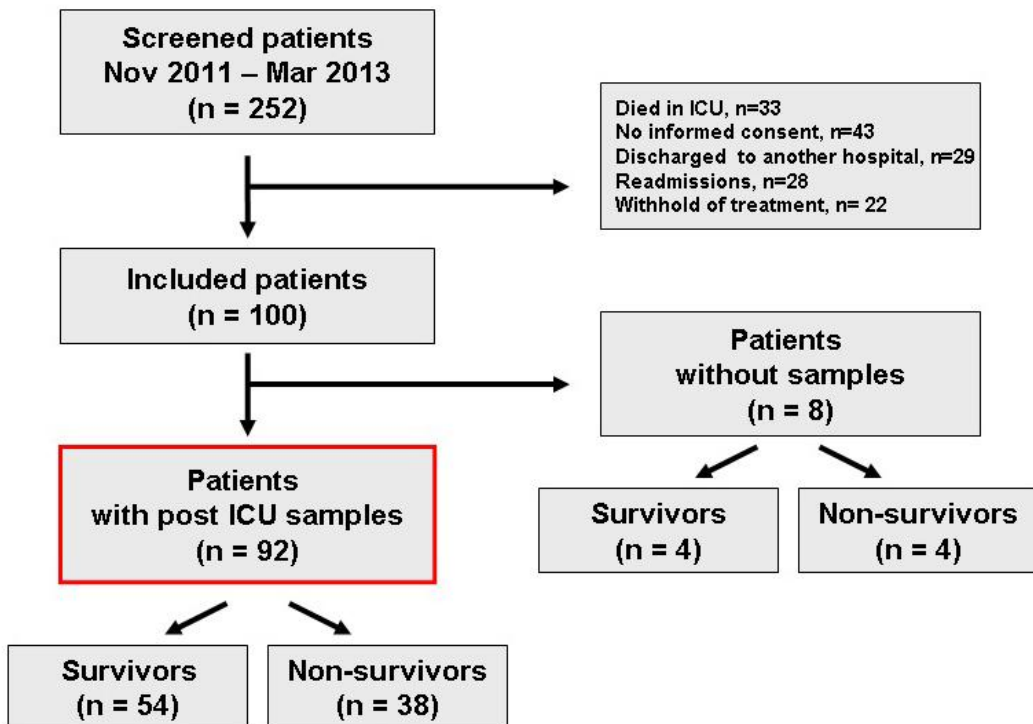

Supplement: MOESM4 [file 9779964]
